# Supplementary material for: 1D ZnO/BiVO4 heterojunction photoanodes for efficient photoelectrochemical water splitting
Source: Royal Society of Chemistry journal article supplement (doi:10.1039/c6dt02027e), 2016-01-01
Supplement: c6dt02027e1.pdf [file c6dt02027e1.pdf]

**Supporting information:**

Fig.S1 EDS of the obtained ZnO NRs/BiVO<sub>4</sub>

Fig.S2 UV-Vis light absorption spectra of ZnO NRs and ZnO NRs/BiVO<sub>4</sub>

Fig.S3 Top-view SEM images of ZnO NRs/BiVO<sub>4</sub> after 1000s stability testing

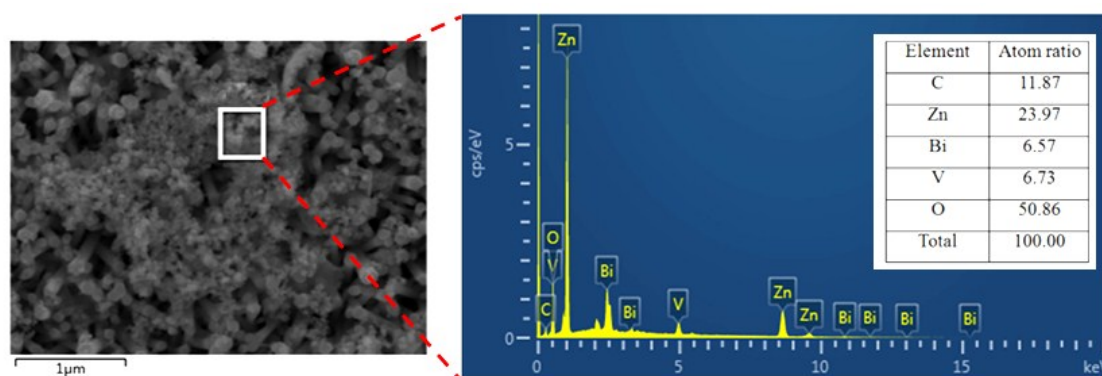

Fig.S1 EDS of the obtained ZnO NRs/BiVO<sub>4</sub>

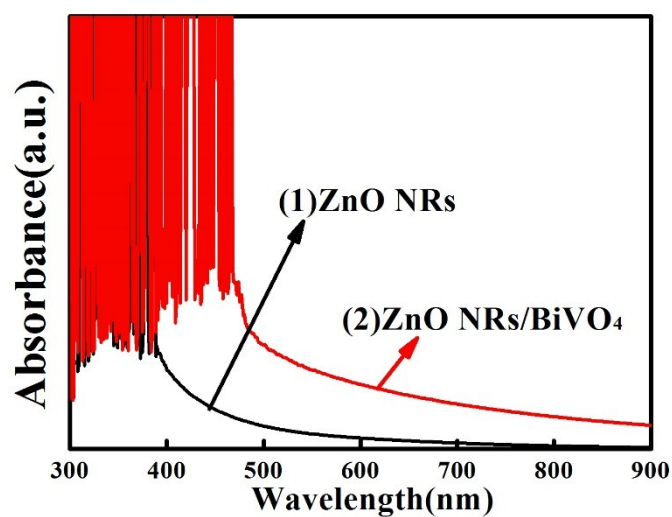

Fig.S2 UV-Vis light absorption spectra of ZnO NRs and ZnO NRs/BiVO<sub>4</sub>

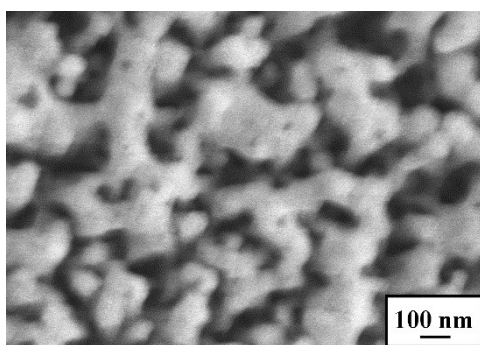

Fig.S3 Top-view SEM images of ZnO NRs/BiVO<sub>4</sub> after 1000s stability testing
